# Supplementary material for: Maternal cholestasis during pregnancy programs metabolic disease in offspring
Source: JCI journal article supplement (doi:10.1172/jci68927), 2013-06-23
Supplement: sd1 [file 1]

## **SUPPLEMENTAL MATERIAL**

### **Cholestatic pregnancy programmes metabolic disease in the offspring**

#### **Supplemental Tables**

**Supplemental Table 1: Morphometric features of mouse cholestatic pregnancy**

| <b>Maternal diet</b> | <b>Litter size</b> | <b>Fetal body weight (g)</b> |
|----------------------|--------------------|------------------------------|
| NC                   | 7.2 ± 1.4          | 0.83 ± 0.2                   |
| CA                   | 6.5 ± 1.2          | 0.76 ± 0.2                   |

NC: normal chow, CA: cholic acid; n=17 animals per group; ± values represent standard error of the mean (SEM)

**Supplemental Table 2: Transcriptomic profile in livers of western diet (WD)-fed females from cholestatic mothers as predicted with Ingenuity Pathway Analysis of microarray data.**

| Gene ID  | Gene name | fold-change | Pathway                           |
|----------|-----------|-------------|-----------------------------------|
| BC006872 | Cel       | 169         | Fatty acid synthesis and cleavage |
| AK133952 | Myc       | 169         | Fatty acid synthesis and cleavage |
| AK171155 | Dpep2     | 66          | Fatty acid synthesis and cleavage |
| BC145908 | Pla2g1b   | 42          | Fatty acid synthesis and cleavage |
| AK152189 | Il6       | 2.5         | Fatty acid synthesis and cleavage |
| BC027742 | Clec7a    | 2.4         | Fatty acid synthesis and cleavage |
| AF359558 | Il4       | 1.9         | Fatty acid synthesis and cleavage |
| AK079235 | Ggt1      | 1.9         | Fatty acid synthesis and cleavage |
| BC094923 | Pnliprp1  | 1.6         | Fatty acid synthesis and cleavage |
| BC062902 | Gpc1      | 1.5         | Fatty acid synthesis and cleavage |
| BC145867 | Ccl2      | 1.5         | Fatty acid synthesis and cleavage |
| U49110   | Lepr      | -1.5        | Fatty acid synthesis and cleavage |
| AB005909 | Dmbt1     | 386         | Inflammation                      |
| BC119057 | Mmp7      | 9           | Inflammation                      |
| AK171435 | Mmp12     | 3.6         | Inflammation                      |
| AK007645 | Gal3st1   | 3.6         | Inflammation                      |
| BC003780 | Chi3l1    | 3           | Inflammation                      |
| BC132069 | Lcn2      | 2.7         | Inflammation                      |
| BC061154 | Chi3l3    | 2.4         | Inflammation                      |
| BC061126 | Ccl7      | 2.3         | Inflammation                      |
| BC141556 | Il8ra     | 2.3         | Inflammation                      |
| BC002063 | Lgals1    | 2.2         | Inflammation                      |
| AF359558 | Il4       | 2           | Inflammation                      |
| BC006783 | Ctgf      | 1.9         | Inflammation                      |
| BC003480 | Capg      | 1.8         | Inflammation                      |
| BC010726 | Pla2g7    | 1.6         | Inflammation                      |
| BC033485 | Trem2     | 1.6         | Inflammation                      |
| X16834   | Lgals3    | 1.6         | Inflammation                      |
| BC132022 | Raet1b    | 1.6         | Inflammation                      |
| BC146516 | Ear10     | 1.5         | Inflammation                      |
| AK152189 | Il6       | 1.5         | Inflammation                      |
| BC145867 | Ccl2      | 1.5         | Inflammation                      |

Fold-change of liver gene expression of WD-fed female offspring from cholestatic mothers compared to hepatic gene expression of WD-fed females from normal mothers. Significant changes ( $p \leq 0.05$ ) with a fold-change  $\geq 1.5$  are shown. Gene expression profile is consistent with increased fatty acid synthesis and cleavage and inflammation in the WD-fed female from CA-fed mothers.

**Supplemental Table 3: Inflammation-related genes that significantly change in white adipose tissue (WAT) of western diet (WD)-fed females from cholestatic mothers as predicted with Ingenuity Pathway Analysis**

| <b>Gene ID</b> | <b>Gene name</b> | <b>fold-change</b> |
|----------------|------------------|--------------------|
| AK132915       | Itgad            | 15                 |
| BC054091       | Serpine1         | 4.7                |
| BC055885       | Saa3             | 3.5                |
| BC109158       | Selp             | 3.2                |
| BC094009       | Krt8             | 3.1                |
| BC006783       | Ctgf             | 3.1                |
| BC012650       | Cldn3            | 3                  |
| AK137169       | Itga1            | 2.8                |
| BC054530       | Podxl            | 2.6                |
| BC096586       | Prlr             | 2.6                |
| BC012690       | Vtn              | 2.5                |
| AK133483       | Gnaz             | 2.4                |
| AK143562       | Lbp              | 2.3                |
| BC020530       | Kdr              | 2.3                |
| BC007125       | Aqp1             | 2.2                |
| BC019460       | Esam             | 2.2                |
| AK133933       | Sept4            | 2.1                |
| BC062378       | Nos2             | 2.1                |
| BC050824       | Tek              | 2.1                |
| AK159653       | Itga6            | 2                  |
| AK169431       | Pecam1           | 2                  |
| AK028157       | Mrc2             | 2                  |
| BC020532       | Rapgef3          | 2                  |
| BC053430       | Pdgfb            | 2                  |
| BC036175       | Agtr1a           | 2                  |
| BC065077       | Lhx6             | 2                  |
| AK172072       | Sh2d3c           | 1.9                |
| BC016505       | Ephb4            | 1.9                |
| BC004656       | Scarb1           | 1.9                |
| AF114266       | Tgm2             | 1.9                |
| AK145864       | Lifr             | 1.9                |
| BC156151       | Myo10            | 1.9                |
| AF469622       | Arap3            | 1.9                |
| BC022107       | Cdh2             | 1.8                |
| BC075716       | Kit              | 1.8                |
| BC021655       | Akr1b3           | 1.8                |
| AK140530       | Plcl1            | 1.7                |
| S75867         | Itpr1            | 1.7                |
| BC021876       | F11R             | 1.7                |
| BC156169       | Dock4            | 1.7                |
| U28151         | Bcar1            | 1.7                |
| BC060129       | Nrp1             | 1.5                |
| BC030478       | Mylk             | 1.5                |

|          |       |      |
|----------|-------|------|
| AK202858 | Pkd1  | 1.5  |
| BC005452 | Bgn   | 1.5  |
| BC132544 | Rgs18 | -2.5 |
| AF033112 | Siva1 | -1.6 |
| BC006763 | Cbfb  | -1.5 |

Fold-change of WAT gene expression of WD-fed female offspring from cholestatic mothers compared to WAT gene expression of WD-fed females from normal mothers. Significant changes ( $p \leq 0.05$ ) with a fold-change  $\geq 1.5$  are shown. Gene expression profile is consistent with increased inflammation in the WD-fed female from cholic acid (CA)-fed mothers.

**Supplemental Table 4: Fetal metabolic pathways in mouse pregnancy**

|                                                                                                 | from NC-fed mother | from CA-fed mother |
|-------------------------------------------------------------------------------------------------|--------------------|--------------------|
| <b>Serum total bile acids (<math>\mu\text{mol/l}</math>)</b>                                    | $18 \pm 10$        | $72 \pm 20^*$      |
| <b>Bile acid homeostasis pathways<br/>(mRNA; relative expression to cyclophilin)</b>            |                    |                    |
| Bsep                                                                                            | $1.15 \pm 0.3$     | $5.20 \pm 0.8^*$   |
| Cyp7a1                                                                                          | $0.5 \pm 0.3$      | $0.3 \pm 0.08^*$   |
| Shp                                                                                             | $1.1 \pm 0.2$      | $12.6 \pm 1.1^*$   |
| Mrp3                                                                                            | $1.2 \pm 0.2$      | $3.7 \pm 0.5^*$    |
| Mrp4                                                                                            | $1.9 \pm 0.4$      | $6.8 \pm 1.1^*$    |
| Sult2a1                                                                                         | $1.0 \pm 0.1$      | $4.7 \pm 0.7^*$    |
| <b>Hepatic lipid profiles (<math>\mu\text{mol/mg prt}</math>)</b>                               |                    |                    |
| Cholesterol                                                                                     | $0.09 \pm 0.004$   | $0.13 \pm 0.006^*$ |
| TG                                                                                              | $0.29 \pm 0.01$    | $0.36 \pm 0.02^*$  |
| FFA                                                                                             | $0.13 \pm 0.01$    | $0.18 \pm 0.03$    |
| <b>Cholesterol biosynthesis pathway<br/>(mRNA; relative expression to cyclophilin)</b>          |                    |                    |
| Dhcr-7                                                                                          | $0.7 \pm 0.09$     | $1.7 \pm 0.1^*$    |
| Hmgcr                                                                                           | $1.4 \pm 0.3$      | $7.4 \pm 0.8^*$    |
| Srebp2                                                                                          | $1.4 \pm 0.3$      | $5.8 \pm 0.9^*$    |
| <b>Fatty acid/triglyceride synthesis pathway<br/>(mRNA; relative expression to cyclophilin)</b> |                    |                    |
| Fas                                                                                             | $1.1 \pm 0.1$      | $3.5 \pm 0.4^*$    |
| Lxr- $\alpha$                                                                                   | $1.3 \pm 0.1$      | $5.7 \pm 0.5^*$    |
| Scd-2                                                                                           | $1.0 \pm 0.2$      | $2.6 \pm 0.6^*$    |
| Srebp1c                                                                                         | $1.3 \pm 0.16$     | $3.1 \pm 0.2^*$    |

The fetuses of cholestatic mothers had increased serum bile acid levels as well as induced bile acid excretory pathways consistent with a cholestatic phenotype (1). Moreover, *de novo* hepatic cholesterol and fatty acid biosynthetic (2) pathways were also increased in fetuses of CA-fed mothers. NC: normal chow, CA: cholic acid; TG: triglycerides, FFA: free fatty acids; n=6 animals per group, \*  $p \leq 0.05$ ;  $\pm$  values represent standard error of the mean (SEM).

**Supplemental Table 5: Primer sequences**

| <b>Gene name</b>                                 | <b>Forward primer</b>      | <b>Reverse primer</b>     |
|--------------------------------------------------|----------------------------|---------------------------|
| <b>Lipid storage</b>                             |                            |                           |
| Acat-2                                           | ATATGAGCAAGGCTCCTCAC       | GGTAGTTGTGAAAGGCATCTG     |
| Adrp (Plin2)                                     | TGGCAGCAGCAGTAGTGGAT       | AGCTCACCAAGGGCAGGTT       |
| <b>Inflammation</b>                              |                            |                           |
| Col4a1                                           | GCCCTTCATTAGCAGCTTTC       | GCACTGCGGAATCTGAATG       |
| Ctgf                                             | CAGAACGCACACTGAGGTGA       | TGCTATAATTGCCCTCCCCG      |
| Nos                                              | TCAACCTCCTGACTGAAGCA       | CCAAGCCATCATTGGGAGTAGA    |
| <b>Bile acid homeostasis pathways</b>            |                            |                           |
| Bsep                                             | AAGCTACATCTGCCTTAGACACAGAA | CAATACAGGTCCGACCCTCTCT    |
| Cyp7a1                                           | AGCAACTAAACAACCTGCCAGTACTA | GTCCGGATATTCAAGGATGCA     |
| Shp                                              | CGATCCTCTTCAACCCAGATG      | AGGGCTCCAAGACTTCACACA     |
| Mrp3                                             | GCAGCAGAACCAAGCATCAAG      | GACCGCATCCTCACCTGG        |
| Mrp4                                             | GGTTGGAATTGTGGGCAGAA       | TCGTCCGTGTGCTCATTGAA      |
| Sult2a1                                          | GAAGGCATACCTTTTCCTGCCA     | GTAACCAGACACAAGAATATCT    |
| <b>Cholesterol biosynthesis pathway</b>          |                            |                           |
| Dhcr-7                                           | GCCAAGACACCACCTGTGACAG     | TGGACGCCTCCACATAACC       |
| Hmgcr                                            | TTGGCACCATGTCAGGCGTCC      | AGCGACACACAGGCCGGGAA      |
| Srebp2                                           | CCTAGACCTCGCCAAAGGTG       | CAGGCTGTAGCGGATCACAT      |
| <b>Fatty acid/triglyceride synthesis pathway</b> |                            |                           |
| Fas                                              | CCCAGAGGCTTGTGCTGACT       | CGAATGTGCTTGGCTTGGT       |
| Lxr- $\alpha$                                    | AGGAGTGTGCTGCTCGCAA        | CTCTTCTTGCCGCTTCAGTTT     |
| Scd-2                                            | AGCGGGCTGCAGAAACTTAG       | GGCTGAGTAAGCGCCAGAGAT     |
| Srebp1c                                          | GGAGCCATGGATTGCACATT       | GGCCCGGAAGTCACTGT         |
| <b>Genes used for normalization</b>              |                            |                           |
| Ap2                                              | ACACCGAGATTTCTTCAAACCTG    | CCATCTAGGGTTATGATGCTCTTCA |
| Cyclophilin                                      | TGGAGAGCACCAAGACAGACA      | TGCCGGAGTCGACAATGAT       |

## Supplemental Figures

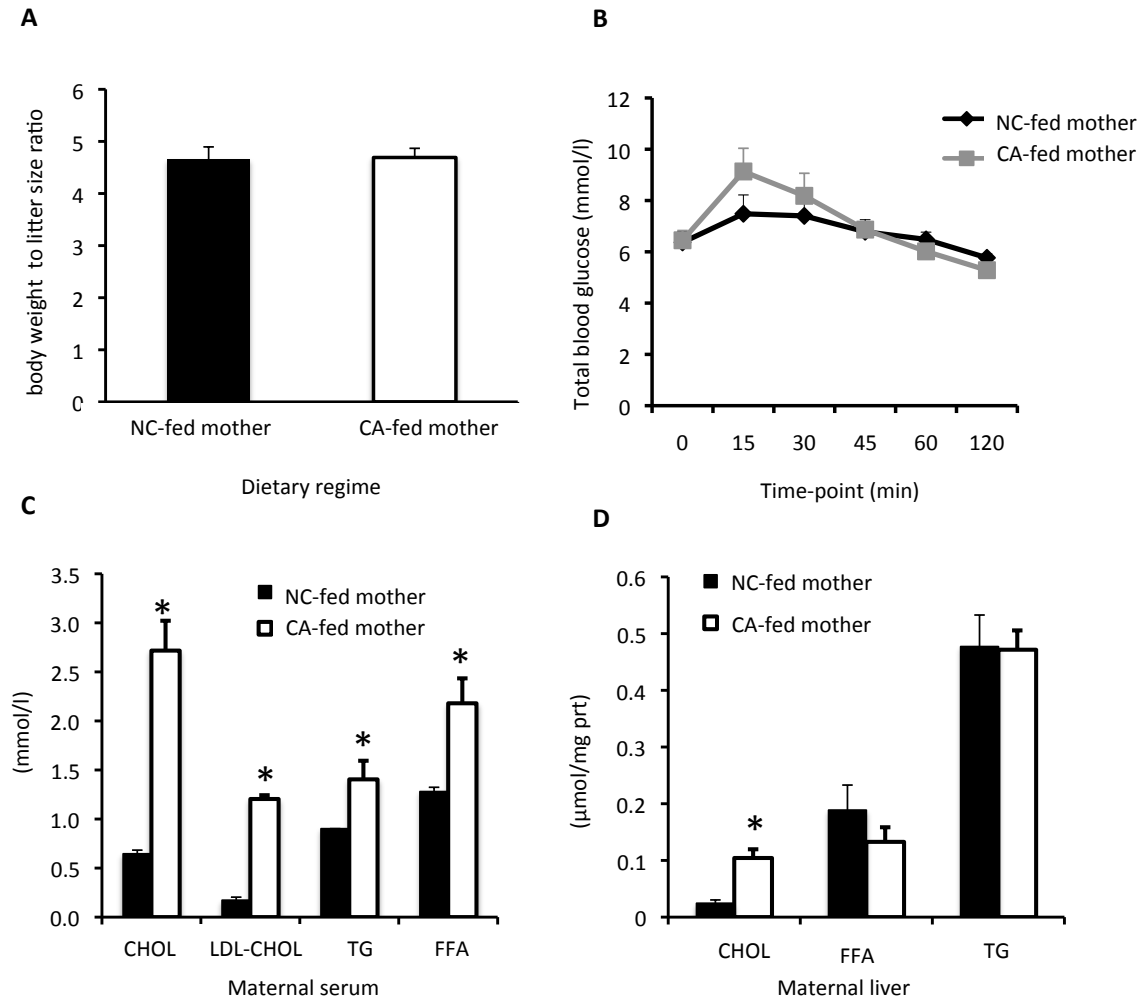

**Supplemental Figure 1: Mouse cholestatic pregnancy results in maternal dyslipidemia without affecting body weight and glucose tolerance.** A) Body weight to litter size ratio in normal chow (NC)-fed and cholic acid (CA)-fed mice on day 18 of pregnancy, n=6 animals per group. B) Glucose tolerance test in NC-fed and CA-fed mice on day 18 of pregnancy after a 6-hour fast. Following an intraperitoneal injection of glucose (1g/kg body weight), total blood glucose was measured at the indicated time-points, n=6 animals per group. C, D) Lipid levels in NC-fed and CA-fed mice on day 18 of pregnancy in maternal serum (C) and liver (D). Significance of data was established by Student *t*-testing, n=6 animals per group, \* $p \leq 0.05$ . Chol: cholesterol, LDL-chol: low-density lipoprotein-cholesterol, TG: triglycerides, FFA: free fatty acids.

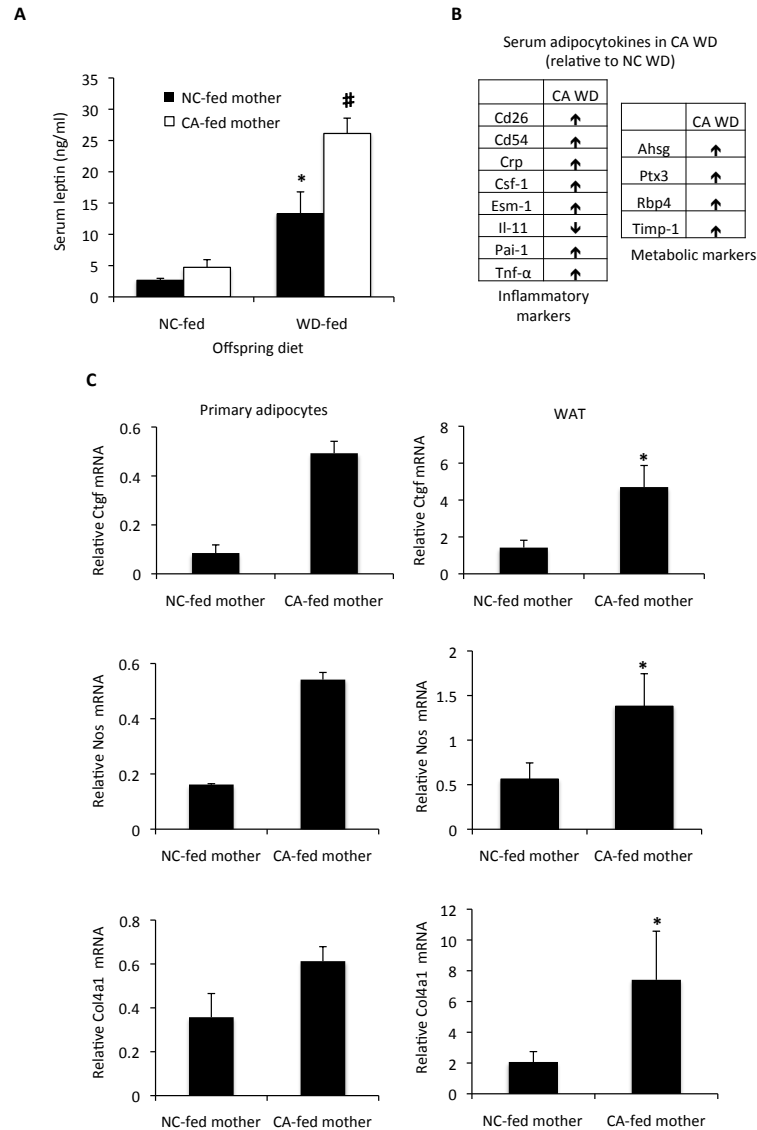

**Supplemental Figure 2: Effects of cholestatic pregnancy on adipose tissue function.** A) Serum leptin levels in female offspring after a 4-hour fast,  $n=6$  animals per group,  $*p \leq 0.05$  for differences in offspring fed a different diet,  $^{\#}p \leq 0.05$  for differences in offspring exposed to a different intrauterine environment. B) Markers of inflammation and metabolic pathways in serum of WD-fed female offspring of CA-fed mothers (compared to WD-fed offspring of NC-fed mothers).  $\uparrow$ : increase,  $\downarrow$  decrease. C) Ctgf, Nos and Col4a1 mRNA expression relative to cyclophilin in differentiated primary adipocytes (left panel) isolated from WD-fed female offspring of NC-fed or CA-fed mothers. Differentiation levels were normalized to the aP2 differentiation marker. Error bars represent SD of duplicate wells of the same group of animals. WAT tissue of WD-fed offspring (right panel) was also assessed for target gene mRNA levels.  $n=4$  animals per group,  $*p < 0.05$ , error bars represent  $\pm$  standard error of the mean (SEM). WAT: white adipose tissue, NC: normal chow, CA: cholic acid, WD: western diet, NC WD: WD-fed offspring from NC-fed mothers, CA WD: WD-fed offspring from CA-fed mothers.





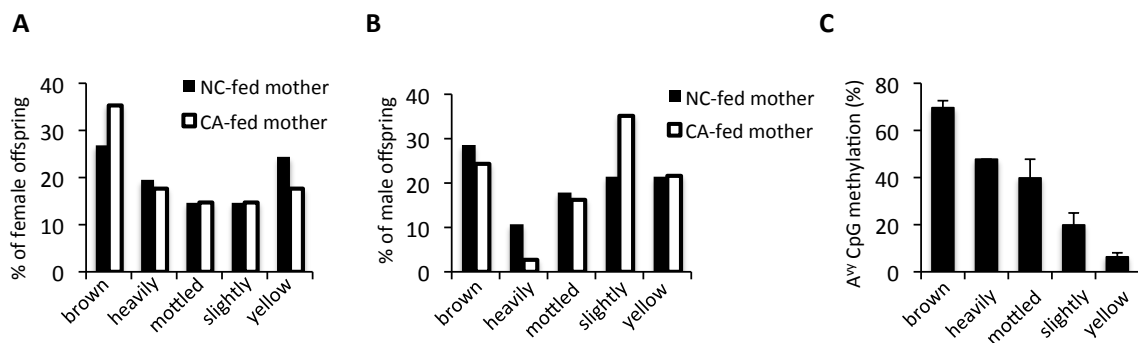

**Supplemental Figure 4: Cholestatic pregnancy alters the epigenome of 3-week old offspring.** A) Coat colour phenotype of female offspring of normal chow (NC)- or cholic acid (CA)-fed mothers. B) Coat colour phenotype of male offspring of NC- or CA-fed mothers. C) Percentage methylation of CpG sites of the *A<sup>y</sup>* cryptic promoter in at least 4 samples per phenotype.

## References

1. Goodwin, B., Jones, S.A., Price, R.R., Watson, M.A., McKee, D.D., Moore, L.B., Galardi, C., Wilson, J.G., Lewis, M.C., Roth, M.E., et al. 2000. A regulatory cascade of the nuclear receptors FXR, SHP-1, and LRH-1 represses bile acid biosynthesis. *Mol Cell* 6:517-526.
2. Goldstein, J.L., DeBose-Boyd, R.A., and Brown, M.S. 2006. Protein sensors for membrane sterols. *Cell* 124:35-46.
